# Supplementary material for: Mate Pair Sequencing of Whole-Genome-Amplified DNA Following Laser Capture Microdissection of Prostate Cancer
Source: PubMed Central journal article supplement — DNA Res. 2012 Sep 18;19(5):395–406. doi: 10.1093/dnares/dss021 (PMC3473372; doi:10.1093/dnares/dss021), 2012-09-18
Supplement: supp_dss021_dss021supp_Table1.pdf [file supp_dss021_dss021supp_Table1.pdf]

**Supplemental Table 1: Fusion break points for the validated genomic rearrangements in the GP3 and GP4 cancers.**

| Event     | Position 1         | Position 2         | Junction Span | Fusion Sequenece                                                    |
|-----------|--------------------|--------------------|---------------|---------------------------------------------------------------------|
| r (2-2)a  | chr2: 111,532,439  | chr2: 111,595,676  | 1494938       | AGGGACTCTGAATAGCCAAA - G - CACCTATATATGAGTGTGCA                     |
| r (2-2)b  | chr2: 111,875,953  | chr2: 113,370,891  | 4403327       | CGGACTGGGAGAAGGAAGTG - CCCTACTCTCTTCTGGCTTG                         |
| r (4-4)a  | chr4: 121,955,371  | chr4: 126,358,698  | 42925061      | TGGTAAATTGACTTGGCGT - GG - ACTGAGAAATTTCTGTCCAG                     |
| r (4-4)b  | chr4: 102,288,776  | chr4: 145,213,837  | 24844609      | TGGCTAATTTGTGTGTGTG - GAGAATATTTCTTTGTAATG                          |
| r (4-4)c  | chr4: 121,967,956  | chr4: 146,812,565  | 36076150      | TCTTGTGATTCTGGACAAAT - AGTTTCCTCTGGATTTGA                           |
| r (4-4)d  | chr4: 101,807,349  | chr4: 137,883,499  | 39097655      | GTC AATGCATTCTTCACTGC - AACACTGGAGCACAGATATA                        |
| r (4-4)e  | chr4: 107,030,113  | chr4: 146,127,768  | 6828701       | TGGTGGCAGGCAAGAGAGCT - CAACGACAACCAACCTGAAA                         |
| r (6-6)   | chr6: 97,666,135   | chr6: 104,494,836  | 57210211      | AATTCACTAGTTATCAITGA - GGGAGAAAAAAGGTCCCTAT                         |
| r (11-11) | chr11: 68,314,607  | chr11: 125,524,818 | 32961623      | TCCATAGGCAGTGAGGGTTT - CATATCCAATTTAAATCCC                          |
| t (8-11)a | chr8: 100,826,029  | chr11: 67,864,406  | n/a           | AAATGTCATTGTTGTTTAA - TTTGC - TGAGATACCTTGGAAAGAGA                  |
| t (8-11)b | chr11: 100,475,064 | chr11: 125,524,767 | n/a           | GCTTCTCTCTCTTGGTCGT - TAACTATACAACCTAAACTG                          |
| t (2-23)  | chr2: 105,357,774  | chrX: 217,536,963  | n/a           | TTGAATAAGTTACCAAAAAGA - TGGTTTTTTAATTCCTTAAG                        |
| t (7-17)  | chr7: 13,909,717   | chr17: 7,969,926   | n/a           | TGTATCTGCATTGGTGCT - GGTCAAACCTTGGTTCAGAA                           |
| t (17-19) | chr17: 53,592,759  | chr19: 45,959,687  | n/a           | TGTCGCAACTTAAAAGTCTT - TGGGAGGCCCTGACTCCAC                          |
| t (1-12)  | chr1: 213,127,018  | chr12: 89,406,958  | n/a           | TCATTCACTTAAAATCTCTG - TCC - CACAATAACTTTACCTTTGA                   |
| t (12-1)  | chr12: 89,407,157  | chr1: 213,127,057  | n/a           | GATTAACAGTATTGCTTGA - AAGTCTGGTCTATTCCCATTTTATAGATGAGAAAACTAAG      |
| r (12-12) | chr12: 213,127,018 | chr12: 213,127,061 | n/a           | AAGTCTGGTCTATTCCCATTTTATAGATGAGAAAAAC - TAAG - TTCTTTCCAGCTCTAAAATC |
