# Supplementary material for: Mate Pair Sequencing of Whole-Genome-Amplified DNA Following Laser Capture Microdissection of Prostate Cancer
Source: PubMed Central journal article supplement — DNA Res. 2012 Sep 18;19(5):395–406. doi: 10.1093/dnares/dss021 (PMC3473372; doi:10.1093/dnares/dss021), 2012-09-18
Supplement: supp_dss021_dss021supp_Table2.pdf [file supp_dss021_dss021supp_Table2.pdf]

**Supplemental Table 2: Comparison of MP sequencing data from the average of 8 unamplified genomic DNA samples and 8 WGA samples.**

|      | Total Number of MPs | % Replication | Bridged Coverage | Base Pair Coverage | Discordant MPs No Filter | Discordant MPs + Filter | % Discordant MPs + F | % MP noFilter NO Associates | % MP + Filter NO Associates |
|------|---------------------|---------------|------------------|--------------------|--------------------------|-------------------------|----------------------|-----------------------------|-----------------------------|
| gDNA | 96,772,473          | 19%           | 33 x             | 5 x                | 7,405,699                | 493,046                 | 6.89%                | 82.88%                      | 98.81%                      |
| WGA  | 91,023,609          | 21%           | 30 x             | 4 x                | 4,949,214                | 434,917                 | 8.85%                | 91.13%                      | 98.76%                      |
